# Supplementary material
Source: Research Square preprint supplement (doi:10.21203/rs.3.rs-9728846/v1)
Supplement: Supplementary file 1 [file 2d96063529c0d7244a3611fa.xlsx]

## Sheet: Sheet1
Table 2. Proportion of participants with increased spinal FDG uptake (SUVmax ≥2.5) by age group
Age group	SUVmax <2.5	SUVmax ≥2.5	Total
20-29	23 (79.3%)	6 (20.7%)	29
30-39	387 (89.0%)	48 (11.0%)	435
40-49	1301 (85.2%)	226 (14.8%)	1527
50-59	1390 (82.0%)	305 (18.0%)	1695
60-69	615 (78.8%)	165 (21.2%)	780
70-79	276 (76.9%)	83 (23.1%)	359
80-89	43 (76.8%)	13 (23.2%)	56
90-99	0 (0%)	1 (100.0%)	1
Total	4035 (82.7%)	847 (17.3%)	4882
Data are presented as the number of participants (n) and percentage (%). The proportion of participants with SUVmax ≥2.5 increased with age, and the trend was statistically significant using the Cochran–Armitage trend test (Z = 5.91, p < 0.001).
