# Supplementary material
Source: Research Square preprint supplement (doi:10.21203/rs.3.rs-9728846/v1)
Supplement: Supplementary file 2 [file 3fe7c7a4cc029d51280adb0a.xlsx]

## Sheet: Sheet1
Table 4. Distribution of longitudinal change categories in spinal FDG uptake by age group
	30-39	40-49	50-59	60-69	70-79	80-89	90-99
Negative conversion	5 (71.4%)	91 (87.5%)	125 (96.9%)	59 (84.3%)	25 (78.1%)	2 (66.7%)	0 (0%)
Decrease	0 (0%)	0 (0%)	0 (0%)	1 (1.4%)	1 (3.1%)	1 (33.3%)	0 (0%)
Stable	2 (28.6%)	12 (11.5%)	2 (1.6%)	5 (7.1%)	4 (12.5%)	0 (0%)	1 (100.0%)
Increase	0 (0%)	1 (1.0%)	2 (1.6%)	5 (7.1%)	2 (6.3%)	0 (0%)	0 (0%)
Total, n	7	104	129	70	32	3	1
Data are presented as the number of participants (n) and percentage (%). Longitudinal changes in spinal FDG uptake were categorized as negative conversion (decrease in SUVmax to <2.5), decrease (≥20% reduction from baseline), stable (absolute change of <20% from baseline), or increase (≥20% increase from baseline). Percentages may not sum to 100% due to rounding.
