# Supplementary material
Source: Research Square preprint supplement (doi:10.21203/rs.3.rs-9728846/v1)
Supplement: Supplementary file 3 [file 491ac7a0abeb724a19220f83.xlsx]

## Sheet: Supplementary table 4
Table 7. Distribution of longitudinal change categories in spinal FDG uptake by spinal level
	Cervical	Thoracic	Lumbosacral
Negative conversion	34 (81.0%)	122 (92.4%)	151 (87.8%)
Decrease	2 (4.8%)	0 (0%)	1 (0.6%)
Stable	4 (9.5%)	9 (6.8%)	13 (7.6%)
Increase	2 (4.8%)	1 (0.8%)	7 (4.1%)
Total	42	132	172
Data are presented as the number of participants (n) and percentage (%). Longitudinal changes in spinal FDG uptake were categorized as negative conversion (decrease in SUVmax to <2.5), decrease (≥20% reduction from baseline), stable (absolute change of <20% from baseline), or increase (≥20% increase from baseline). Percentages may not sum to 100% due to rounding.
