# Supplementary material
Source: Research Square preprint supplement (doi:10.21203/rs.3.rs-9728846/v1)
Supplement: Supplementary file 4 [file 5f673e742bd624c212b492b4.xlsx]

## Sheet: Sheet1
Table 3. Proportion of participants with increased spinal FDG uptake (SUVmax ≥2.5) by sex
	SUVmax<2.5	SUVmax≥2.5
Male	2545 (81.9%)	561 (18.1%)
Female	1490 (83.9%)	286 (16.1%)
Total, n	4035 (82.7%)	847 (17.3%)
Data are presented as the number of participants (n) and percentage (%). There was no significant difference in the proportion of participants with SUVmax ≥2.5 between males and females (chi-square test: χ² = 3.02, p = 0.08).
