# Supplementary material
Source: Research Square preprint supplement (doi:10.21203/rs.3.rs-9728846/v1)
Supplement: Supplementary file 5 [file a0adbf917939b8205856a067.xlsx]

## Sheet: sheet1
Table 1. Characteristics of participants
	n (%)
Whole population	4882
Gender
Male	3106 (63.6%)
Female	1776 (36.4%)
Age (years)	52.7 ± 10.9
20-29	29 (0.59%)
30-39	435 (8.91%)
40-49	1527 (31.28%)
50-59	1695 (34.72%)
60-69	780 (15.98%)
70-79	359 (7.35%)
80-89	56 (1.15%)
90-99	1 (0.02%)
Blood-glucose levels (mmol/L)	101.9 ± 19.1
Values are presented as n (%) or mean ± SD. Blood-glucose levels were missing for 8 participants.
