# Supplementary material
Source: Research Square preprint supplement (doi:10.21203/rs.3.rs-9728846/v1)
Supplement: Supplementary file 6 [file cdc16ebea848d59762e14ec2.xlsx]

## Sheet: Supplementary table 3
Table 6. Distribution of longitudinal change categories in spinal FDG uptake by spinal structure
	Vertebral body	Facet joint	Interspinous joint	Vertebral arch	Spinous process
Negative conversion	238 (91.2%)	50 (79.4%)	12 (92.3%)	6 (75.0%)	1 (100.0%)
Decrease	0 (0%)	2 (3.2%)	0 (0%)	1 (12.5%)	0 (0%)
Stable	18 (6.9%)	6 (9.5%)	1 (7.7%)	1 (12.5%)	0 (0%)
Increase	5 (1.9%)	5 (7.9%)	0 (0%)	0 (0%)	0 (0%)
Total	261	63	13	8	1
Data are presented as the number of participants (n) and percentage (%). Longitudinal changes in spinal FDG uptake were categorized as negative conversion (decrease in SUVmax to <2.5), decrease (≥20% reduction from baseline), stable (absolute change of <20% from baseline), or increase (≥20% increase from baseline).
