# Supplementary material
Source: Research Square preprint supplement (doi:10.21203/rs.3.rs-9728846/v1)
Supplement: Supplementary file 7 [file e0f5c4cf8cce90f0687a7950.xlsx]

## Sheet: Supplementary table 2
Table 5. Distribution of longitudinal change categories in spinal FDG uptake by sex
	Male	Female
Negative conversion	223 (90.7%)	84 (84.0%)
Decrease	1 (0.4%)	2 (2.0%)
Stable	16 (6.5%)	10 (10.0%)
Increase	6 (2.4%)	4 (4.0%)
Total	246	100
Data are presented as the number of participants (n) and percentage (%). Longitudinal changes in spinal FDG uptake were categorized as negative conversion (decrease in SUVmax to <2.5), decrease (≥20% reduction from baseline), stable (absolute change of <20% from baseline), or increase (≥20% increase from baseline).
